# Supplementary material
Source: publisher figshare collection journal article supplement (https://tandf.figshare.com/articles/dataset/_/5573506)
Supplement: Supplementary file 2 [file 2]

## Appendix A Proofs

### A.1 Proof of Theorem 1

We collect some notation. Let  $\mathbb{N}_0 := \{0, 1, \dots\}$ , and  $K > 0$  a positive constant that may change from line to line. An empty sum  $\sum_i^j$  ( $i > j$ ) is defined to be zero. All  $o_P$ - and  $\mathcal{O}_P$ -symbols are to be understood with respect to  $n \rightarrow \infty$ .

We first give a rough outline of the proof of Theorem 1. In the first step we show that

$$\frac{\sqrt{k}}{\log(k/(n\alpha))} \left( \frac{\hat{x}_{\alpha,n}(t)}{x_{\alpha,n}} - 1 \right) = \frac{\sqrt{k}}{\log(k/(n\alpha))} \left( \frac{\hat{x}_{\alpha}^U(t)}{x_{\alpha}^U} - 1 \right) [1 + o_P(1)] + o_P(1) \quad (\text{A.1})$$

uniformly in  $t \in [t_0, 1]$ . To do so, write

$$\begin{aligned} \frac{\hat{x}_{\alpha,n}(t)}{x_{\alpha,n}} - 1 &= \frac{\hat{\mu}_{n+1} + \hat{\sigma}_{n+1} \hat{x}_{\alpha}^U}{\mu_{n+1} + \sigma_{n+1} x_{\alpha}^U} - 1 \\ &= \frac{\frac{\hat{\mu}_{n+1} - \mu_{n+1}}{\sigma_{n+1} x_{\alpha}^U} + \frac{\hat{\sigma}_{n+1}}{\sigma_{n+1}} \left( \frac{\hat{x}_{\alpha}^U(t)}{x_{\alpha}^U} - 1 \right) + \left( \frac{\hat{\sigma}_{n+1}}{\sigma_{n+1}} - 1 \right)}{\frac{\mu_{n+1}}{\sigma_{n+1} x_{\alpha}^U} + 1}. \end{aligned} \quad (\text{A.2})$$

Lemmas 1 and 2 below will show that  $(\hat{\mu}_{n+1} - \mu_{n+1})/(\sigma_{n+1} x_{\alpha}^U) = \mathcal{O}_P(n^{-1/2})$  and  $\hat{\sigma}_{n+1}/\sigma_{n+1} = 1 + \mathcal{O}_P(n^{-1/2})$ , respectively. Combined with the stationarity of  $\mu_{n+1}$ ,  $\sigma_{n+1} \geq \sqrt{\omega^\circ}$  and the fact that  $x_{\alpha}^U \rightarrow \infty$  as  $n \rightarrow \infty$  (see Eq. (A.6) below), (A.2) leads to the desired approximation in (A.1). In the second step, the expansion (see Eq. (A.7) in Hoga (2017b))

$$\frac{\sqrt{k}}{\log(k/(n\alpha))} \left( \frac{\hat{x}_{\alpha}^U(t)}{x_{\alpha}^U} - 1 \right) = \sqrt{k} (\hat{\gamma}(t) - \gamma) + o_P(1) \quad \text{uniformly in } t \in [t_0, 1] \quad (\text{A.3})$$

is the motivation for deriving limit theory for  $\hat{\gamma}$ , which relies on arguments in Hoga (2017a) and Hoga (2017b).

We begin with the first step.

**Lemma 1.** *Suppose Assumptions 1–5 hold and  $\alpha = \alpha_n \rightarrow 0$  as  $n \rightarrow \infty$ . Then*

$$\frac{\hat{\mu}_{n+1} - \mu_{n+1}}{\sigma_{n+1} x_{\alpha}^U} = \mathcal{O}_P \left( \frac{1}{\sqrt{n}} \right).$$

**Proof:** From the recursions in (7) and (8) we obtain, as in the proof of Chan et al. (2007, Thm. 2) and using  $\sqrt{n}$ -consistency of  $\hat{\theta}$ , that

$$\hat{\mu}_{n+1}(\hat{\theta}) - \mu_{n+1} = \mathcal{O}_P \left( \frac{1}{\sqrt{n}} \right). \quad (\text{A.4})$$

Furthermore, almost surely (a.s.),

$$\sigma_{n+1} \geq \sqrt{\omega^\circ} > 0 \quad (\text{A.5})$$

and, by regular variation of  $U$  and, e.g., Haan and Ferreira (2006, Prop. B.1.9.1),

$$x_\alpha^U = U(1/\alpha) \xrightarrow{(n \rightarrow \infty)} \infty. \quad (\text{A.6})$$

Combining (A.4) – (A.6) gives the desired result. ■

The next lemma deals with the estimation of the conditional variance  $\sigma_{n+1}$ . For  $\eta > 0$ , let

$$N_n(\eta) := \left\{ \boldsymbol{\theta} : |\boldsymbol{\theta} - \boldsymbol{\theta}^\circ| \leq \frac{\eta}{\sqrt{n}} \right\}, \quad N_n^-(\eta) := N_n(\eta) \setminus \{\boldsymbol{\theta}^\circ\}.$$

Define

$$\tilde{\sigma}_i^2(\boldsymbol{\theta}) = \omega^\circ + \sum_{j=1}^p \psi_j^\circ \varepsilon_{i-j}^2(\boldsymbol{\theta}) + \sum_{j=1}^q \beta_j^\circ \tilde{\sigma}_{i-j}^2(\boldsymbol{\theta}).$$

**Lemma 2.** *Suppose the assumptions of Theorem 1 hold. Then*

$$\frac{\hat{\sigma}_{n+1}(\hat{\boldsymbol{\theta}})}{\sigma_{n+1}} = 1 + \mathcal{O}_P\left(\frac{1}{\sqrt{n}}\right).$$

**Proof:** For  $\boldsymbol{\theta} \in N_n(\eta)$  write

$$\begin{aligned} \frac{\hat{\sigma}_{n+1}^2(\boldsymbol{\theta})}{\sigma_{n+1}^2} - 1 &= \frac{\hat{\sigma}_{n+1}^2(\boldsymbol{\theta}) - \sigma_{n+1}^2(\boldsymbol{\theta})}{\sigma_{n+1}^2} + \frac{\sigma_{n+1}^2(\boldsymbol{\theta}) - \tilde{\sigma}_{n+1}^2(\boldsymbol{\theta})}{\sigma_{n+1}^2} + \frac{\tilde{\sigma}_{n+1}^2(\boldsymbol{\theta}) - \sigma_{n+1}^2}{\sigma_{n+1}^2} \\ &=: (I) + (II) + (III). \end{aligned} \quad (\text{A.7})$$

For (I) we have from Lemma A 1 below that for some  $r \in (0, 1)$

$$\sup_{\boldsymbol{\theta} \in N_n(\eta)} \left| \hat{\sigma}_i^2(\boldsymbol{\theta}) - \sigma_i^2(\boldsymbol{\theta}) \right| \leq r^i V_i \quad \text{for all } i \in \mathbb{N} \text{ and } n \text{ large enough,}$$

where  $V_i \geq 0$  with  $\sup_{i \in \mathbb{N}} \mathbb{E} \left[ V_i^\delta \right] < \infty$  for some  $\delta > 0$ . Hence, for  $n$  large enough,

$$\begin{aligned} P \left\{ \sqrt{n} \sup_{\boldsymbol{\theta} \in N_n(\eta)} \left| \hat{\sigma}_{n+1}^2(\boldsymbol{\theta}) - \sigma_{n+1}^2(\boldsymbol{\theta}) \right| > \varepsilon \right\} &\leq P \left\{ r^{n+1} V_{n+1} > \varepsilon / \sqrt{n} \right\} \\ &\leq (\varepsilon / \sqrt{n})^{-\delta} \mathbb{E} \left[ r^{n+1} V_{n+1} \right]^\delta \\ &\leq K n^{\delta/2} (r^\delta)^{n+1} \sup_{i \in \mathbb{N}} \mathbb{E} \left[ V_i^\delta \right] \xrightarrow{(n \rightarrow \infty)} 0, \end{aligned}$$

where we have used Markov's inequality in the second step. Since  $\sigma_{n+1}^2 \geq \omega^\circ > 0$  a.s., we conclude

$$\sup_{\boldsymbol{\theta} \in N_n(\eta)} \frac{|\hat{\sigma}_i^2(\boldsymbol{\theta}) - \sigma_i^2(\boldsymbol{\theta})|}{\sigma_{n+1}^2} = \mathcal{O}_P \left( n^{-1/2} \right). \quad (\text{A.8})$$

Now consider (II). Write

$$\frac{\sigma_{n+1}^2(\boldsymbol{\theta}) - \tilde{\sigma}_{n+1}^2(\boldsymbol{\theta})}{\sigma_{n+1}^2} = \frac{\sigma_{n+1}^2(\boldsymbol{\theta}) - \tilde{\sigma}_{n+1}^2(\boldsymbol{\theta})}{\sigma_{n+1}^2(\boldsymbol{\theta})} \cdot \frac{\sigma_{n+1}^2(\boldsymbol{\theta})}{\sigma_{n+1}^2}. \quad (\text{A.9})$$

Observe that by Markov's inequality and Kim and Lee (2016, Lem. 18) we obtain

$$P \left\{ \sqrt{n} \sup_{\boldsymbol{\theta} \in N_n^-(\eta)} \frac{|\sigma_{n+1}^2(\boldsymbol{\theta}) - \tilde{\sigma}_{n+1}^2(\boldsymbol{\theta})|}{\sigma_{n+1}^2(\boldsymbol{\theta})} > K \right\} \leq K^{-1} \mathbb{E} \left[ \sup_{\boldsymbol{\theta} \in N_n^-(\eta)} \frac{|\sigma_{n+1}^2(\boldsymbol{\theta}) - \tilde{\sigma}_{n+1}^2(\boldsymbol{\theta})|}{|\hat{\boldsymbol{\theta}} - \boldsymbol{\theta}^\circ| \sigma_{n+1}^2(\boldsymbol{\theta})} \sqrt{n} |\hat{\boldsymbol{\theta}} - \boldsymbol{\theta}^\circ| \right] \\ = K^{-1} \mathcal{O}(1) \xrightarrow{(K \rightarrow \infty)} 0,$$

i.e.,

$$\sup_{\boldsymbol{\theta} \in N_n^-(\eta)} \frac{|\sigma_{n+1}^2(\boldsymbol{\theta}) - \tilde{\sigma}_{n+1}^2(\boldsymbol{\theta})|}{\sigma_{n+1}^2(\boldsymbol{\theta})} = \mathcal{O}_P(n^{-1/2}). \quad (\text{A.10})$$

From the displays below Eq. (65) in Kim and Lee (2016) we get

$$\sup_{\boldsymbol{\theta} \in N_n^-(\eta)} \left| \frac{\sigma_{n+1}^2}{\sigma_{n+1}^2(\boldsymbol{\theta})} - 1 \right| = o_P(1). \quad (\text{A.11})$$

Now (A.9)–(A.11) yield

$$\sup_{\boldsymbol{\theta} \in N_n^-(\eta)} \frac{|\sigma_{n+1}^2(\boldsymbol{\theta}) - \tilde{\sigma}_{n+1}^2(\boldsymbol{\theta})|}{\sigma_{n+1}^2} = \mathcal{O}_P(n^{-1/2}). \quad (\text{A.12})$$

Finally, consider (III). Eq. (63) in Kim and Lee (2016) implies

$$\sup_{\boldsymbol{\theta} \in N_n(\eta)} \left| \frac{\tilde{\sigma}_{n+1}^2(\boldsymbol{\theta})}{\sigma_{n+1}^2} - 1 \right| = \mathcal{O}_P(n^{-1/2}). \quad (\text{A.13})$$

Combine (A.7) with (A.8), (A.12) and (A.13) to obtain

$$\sup_{\boldsymbol{\theta} \in N_n(\eta)} \left| \frac{\hat{\sigma}_{n+1}^2(\boldsymbol{\theta})}{\sigma_{n+1}^2} - 1 \right| = \mathcal{O}_P(n^{-1/2}). \quad (\text{A.14})$$

Since, by  $\sqrt{n}$ -consistency from Assumption 4,  $\hat{\boldsymbol{\theta}} \in N_n(\eta)$  with probability approaching 1 as  $n \rightarrow \infty$  followed by  $\eta \rightarrow \infty$ , the conclusion follows from (A.14).  $\blacksquare$

For the second step our first goal is to prove

**Theorem 2.** *Suppose the assumptions of Theorem 1 hold. Then, for any  $\nu \in [0, 1/2)$  under a Skorohod construction,*

$$\sup_{t \in [t_0, 1]} \sup_{y \geq 1} y^{\nu/\gamma} \left| t\sqrt{k} \left[ \hat{F}_n(t, y) - y^{-1/\gamma} \right] - \left[ W(t, y^{-1/\gamma}) - y^{-1/\gamma} W(t, 1) \right] \right| \xrightarrow[(n \rightarrow \infty)]{\text{a.s.}} 0,$$

where  $W(\cdot, \cdot)$  is a Brownian sheet.

The proof of Theorem 2 requires the following two propositions, which are proved in Subsection A.2 of this Appendix. Let  $D([a, b] \times [c, d])$  be the space of two-parameter càdlàg functions defined on  $[a, b] \times [c, d]$ , which is equipped with the multivariate extension of the Skorohod metric; see Davidson (1994).

**Proposition 1.** Suppose that  $\{U_i\}$  is a sequence of i.i.d. r.v.s with distributions satisfying Assumption 5. Then for any  $\iota > 0$  and  $\nu \in [0, 1/2)$

$$M_n(t, y) := y^{-\nu} \sqrt{k} \left( \frac{1}{k} \sum_{i=m_n}^{\lfloor nt \rfloor} I_{\{U_i > y^{-\gamma} U(n/k)\}} - yt \right) \xrightarrow[(n \rightarrow \infty)]{\mathcal{D}} y^{-\nu} W(t, y) \quad \text{in } D([t_0, 1] \times [0, 1 + \iota]), \quad (\text{A.15})$$

where  $W(\cdot, \cdot)$  is a Brownian sheet and  $\frac{0}{0} := 0$ .

The next proposition is a weighted version of Proposition 5 in Kim and Lee (2016).

**Proposition 2.** Under the assumptions of Theorem 1 we have that for any  $\iota > 0$  and  $\nu \in [0, 1/2)$

$$\sup_{y \in (0, 1 + \iota)} \sup_{t \in [0, 1]} y^{-\nu} \sqrt{k} \left| \frac{1}{k} \sum_{i=m_n}^{\lfloor nt \rfloor} \left( I_{\{U_i > y^{-\gamma} U(n/k)\}} - I_{\{\hat{U}_i > y^{-\gamma} U(n/k)\}} \right) \right| = o_P(1).$$

**Proof of Theorem 2:** Combine Propositions 1 and 2 to get

$$y^{-\nu} \sqrt{k} \left( \frac{1}{k} \sum_{i=m_n}^{\lfloor nt \rfloor} I_{\{\hat{U}_i > y^{-\gamma} U(n/k)\}} - yt \right) \xrightarrow[(n \rightarrow \infty)]{\mathcal{D}} y^{-\nu} W(t, y) \quad \text{in } D([t_0, 1] \times [0, 1 + \iota]).$$

Then the conclusion follows as in the proof of Corollary 1 in Hoga (2017a). ■

**Proof of Theorem 1:** Theorem 2 implies

$$t\sqrt{k} (\hat{\gamma}(t) - \gamma) \xrightarrow[(n \rightarrow \infty)]{\mathcal{D}} \sigma_{\hat{\gamma}, \gamma} W(t) \quad \text{in } D[t_0, 1] \quad (\text{A.16})$$

for a generic extreme value index estimator based on the sample  $\hat{U}_{m_n}, \dots, \hat{U}_{\lfloor nt \rfloor}$ . For instance, for the Hill (1975) estimator  $\hat{\gamma}(t) = \hat{\gamma}_H(t)$  (moments ratio estimator  $\hat{\gamma}(t) = \hat{\gamma}_{MR}(t)$ ) we have  $\sigma_{\hat{\gamma}, \gamma} = \gamma$  ( $\sigma_{\hat{\gamma}, \gamma} = \sqrt{2}\gamma$ ); see Examples 3 and 4 in Hoga (2017a). To see (A.16) for the Hill estimator (other cases can be dealt with similarly), recall (19) and write for  $\nu \in (0, 1/2)$  (under a Skorohod construction)

$$\begin{aligned} t\sqrt{k} (\hat{\gamma}(t) - \gamma) &= \int_1^\infty t\sqrt{k} \left( \hat{F}_n(t, y) - y^{-1/\gamma} \right) \frac{dy}{y} \\ &\stackrel{\text{a.s.}}{=} \int_1^\infty \left( W(t, y^{-1/\gamma}) - y^{-1/\gamma} W(t, 1) + o(1)y^{-\nu/\gamma} \right) \frac{dy}{y} \\ &= \gamma \int_0^1 (W(t, z) - zW(t, 1) + o(1)z^\nu) \frac{dz}{z} \\ &= \gamma W(t) + o(1), \end{aligned} \quad (\text{A.17})$$

where, by calculating the covariance function,  $W(t) := \int_0^1 [W(t, z) - zW(t, 1)] \frac{dz}{z}$  can easily be identified as a Brownian motion. Note that the weighted convergence in Theorem 2 was required in the step leading to (A.17).

Hence, by (A.1), (A.3) and (A.16), we get

$$\frac{t\sqrt{k}}{\log(k/(n\alpha))} \left( \frac{\widehat{x}_{\alpha,n}(t)}{x_{\alpha,n}} - 1 \right) \xrightarrow[(n \rightarrow \infty)]{\mathcal{D}} \sigma_{\widehat{\gamma}, \gamma} W(t) \quad \text{in } D[t_0, 1]. \quad (\text{A.18})$$

Using that  $\log(1+x) \sim x$  as  $x \rightarrow 0$ , claim (23) for  $z = x$  follows. The other claims, (24) and (25), follow from  $\widehat{\gamma}(1) \rightarrow \gamma$  in probability from (A.16) and a suitable application of the continuous mapping theorem.

Note that in principle one could use (A.18) directly to construct confidence intervals. Yet, Drees (2003) and Gomes and Pestana (2007) found a log-transformation, as in (23), to produce a better agreement of finite-sample and asymptotic distribution for extreme quantile estimators.

For  $z = S$  an exact analogue of (A.2) holds, i.e.,

$$\frac{\widehat{S}_{\alpha,n}(t)}{S_{\alpha,n}} - 1 = \frac{\frac{\widehat{\mu}_{n+1} - \mu_{n+1}}{\sigma_{n+1} S_{\alpha}^U} + \frac{\widehat{\sigma}_{n+1}}{\sigma_{n+1}} \left( \frac{\widehat{S}_{\alpha}^U(t)}{S_{\alpha}^U} - 1 \right) + \left( \frac{\widehat{\sigma}_{n+1}}{\sigma_{n+1}} - 1 \right)}{\frac{\mu_{n+1}}{\sigma_{n+1} S_{\alpha}^U} + 1}. \quad (\text{A.19})$$

Then, similarly as before, Lemmas 1 and 2 yield

$$\frac{\sqrt{k}}{\log(k/(n\alpha))} \left( \frac{\widehat{S}_{\alpha,n}(t)}{S_{\alpha,n}} - 1 \right) = \frac{\sqrt{k}}{\log(k/(n\alpha))} \left( \frac{\widehat{S}_{\alpha}^U(t)}{S_{\alpha}^U} - 1 \right) + o_P(1).$$

So it suffices to prove, by (A.3) and (A.16),

$$\frac{\sqrt{k}}{\log(k/(n\alpha))} \left( \frac{\widehat{S}_{\alpha}^U(t)}{S_{\alpha}^U} - 1 \right) = \frac{\sqrt{k}}{\log(k/(n\alpha))} \left( \frac{\widehat{x}_{\alpha}^U(t)}{x_{\alpha}^U} - 1 \right) + o_P(1). \quad (\text{A.20})$$

To do so, write

$$\frac{\sqrt{k}}{\log(k/(n\alpha))} \left( \frac{\widehat{S}_{\alpha}^U(t)}{S_{\alpha}^U} - 1 \right) = \frac{\sqrt{k}}{\log(k/(n\alpha))} \left( \frac{\widehat{x}_{\alpha}^U(t)}{x_{\alpha}^U} \cdot \frac{1 - \gamma}{1 - \widehat{\gamma}(t)} \cdot \frac{\frac{x_{\alpha}^U}{1 - \gamma}}{S_{\alpha}^U} - 1 \right). \quad (\text{A.21})$$

Note that by (A.16)

$$\frac{1 - \gamma}{1 - \widehat{\gamma}(t)} = \frac{1 - \gamma}{1 - \gamma + \mathcal{O}_P(k^{-1/2})} = 1 + \mathcal{O}_P(k^{-1/2}) \quad (\text{A.22})$$

uniformly in  $t \in [t_0, 1]$ . Due to Assumption 5 and Haan and Ferreira (2006, Thm. 2.3.9), we may apply Pan, Leng, and Hu (2013, Thm. 4.2) to obtain

$$\lim_{n \rightarrow \infty} \frac{1}{A(1/(1 - F(x_{\alpha}^U)))} \left( \frac{S_{\alpha}^U}{x_{\alpha}^U} - \frac{1}{1 - \gamma} \right) = \frac{1}{(1/\gamma - 1)(1/\gamma - 1 - \rho)}. \quad (\text{A.23})$$

Now by basic properties of inverse functions, we have

$$F(x_{\alpha}^U) = F(F^{-1}(1 - \alpha)) \geq 1 - \alpha,$$

so that for sufficiently large  $n$

$$\frac{1}{1 - F(x_\alpha^U)} \geq \frac{1}{\alpha} \stackrel{(22)}{\geq} \frac{n}{k}.$$

We conclude, by Assumption 5, that

$$A\left(\frac{1}{1 - F(x_\alpha^U)}\right) = \mathcal{O}(A(n/k)) = o(1/\sqrt{k}),$$

which, together with (A.23), implies

$$\frac{S_\alpha^U}{\frac{x_\alpha^U}{1-\gamma}} = 1 + o(1/\sqrt{k}). \quad (\text{A.24})$$

Combining (A.21)–(A.24) gives (A.20). ■

## A.2 Proofs of Propositions 1 & 2

**Proof of Proposition 1:** Theorem 1 in Hoga (2017a) implies

$$y^{-\nu}\sqrt{k}\left(\frac{1}{k}\sum_{i=1}^{\lfloor nt \rfloor} I_{\{U_i > y^{-\gamma}U(n/k)\}} - yt\right) \xrightarrow{(n \rightarrow \infty)} y^{-\nu}W(t, y) \quad \text{in } D([t_0, 1] \times [0, 1 + \iota]), \quad (\text{A.25})$$

where  $W(\cdot, \cdot)$  is a standard Brownian sheet. Hence it suffices to prove

$$\sup_{y \in [0, 1 + \iota]} y^{-\nu}\sqrt{k} \left| \frac{1}{k} \sum_{i=1}^{m_n-1} I_{\{U_i > y^{-\gamma}U(n/k)\}} \right| = o_P(1).$$

Setting  $t_n = m_n/n$ , the left hand-side can be bounded by

$$\sup_{\substack{t \in [0, t_n] \\ y \in [0, 1 + \iota]}} y^{-\nu}\sqrt{k} \left| \frac{1}{k} \sum_{i=1}^{\lfloor nt \rfloor} I_{\{U_i > y^{-\gamma}U(n/k)\}} - yt \right| + \sup_{\substack{t \in [0, t_n] \\ y \in [0, 1 + \iota]}} y^{-\nu}\sqrt{k}yt =: (I) + (II).$$

The term  $(I)$  is  $o_P(1)$  by (A.25) and the uniform continuity of  $y^{-\nu}W(t, y)$ ; see also Hoga (2017a, Prop. 2). That  $(II) = o_P(1)$  follows easily from  $m_n = o(\sqrt{k})$ . The conclusion follows. ■

It remains to prove Proposition 2. To do so, we assume throughout that the assumptions of Proposition 2 hold. The proof relies on results in Kim and Lee (2016). For ease of reference and to make the proofs more self-contained, we include Lemma 17 and the slightly modified Lemma 19 from Kim and Lee (2016).

Define  $\mathcal{U}_i = \sigma(U_i, U_{i-1}, \dots)$  as the smallest  $\sigma$ -field generated by the  $U_i, U_{i-1}, \dots$  and write  $E_i[\cdot] = E[\cdot | \mathcal{U}_i]$ .

**Lemma A 1** (cf. Kim and Lee (2016, Lem. 17)). *There exist  $r_0 \in (0, 1)$  and  $\mathcal{U}_{i-1}$ -measurable r.v.s*

$V_i \geq 0$ , s.t.  $\sup_{i \in \mathbb{N}} \mathbb{E} |V_i^v| < \infty$  for some  $v > 0$ , and for sufficiently large  $n$

$$\sup_{\boldsymbol{\theta} \in N_n(\eta)} \max \left\{ |\widehat{\varepsilon}_i(\boldsymbol{\theta}) - \varepsilon_i(\boldsymbol{\theta})|, |\widehat{\sigma}_i^2(\boldsymbol{\theta}) - \sigma_i^2(\boldsymbol{\theta})| \right\} \leq r^i V_i \quad \text{for all } i \in \mathbb{N}.$$

Before stating our version of Kim and Lee (2016, Lem. 19), we have to introduce some additional notation. In the following  $\Pi_{1,n,i}^*$ ,  $\Pi_{2,n,i}^*$  and  $\Pi_{3,n,i}$  denote non-negative,  $\mathcal{U}_{i-1}$ -measurable r.v.s with

$$\limsup_{n \rightarrow \infty} \mathbb{E} |\Pi_{1,n,i}^*|^{v_0} < \infty, \quad \limsup_{n \rightarrow \infty} \mathbb{E} |\Pi_{2,n,i}^*|^{v_0/2} < \infty, \quad \limsup_{n \rightarrow \infty} \mathbb{E} |\Pi_{3,n,i}|^{v_0} < \infty \quad \text{for some } v_0 > 2; \quad (\text{A.26})$$

see p. 264 in Kim and Lee (2016). Note that due to our more stringent moment assumption on the GARCH errors  $\{\varepsilon_i\}$  in Assumption 3, we easily obtain stronger moment bounds in (A.26) for  $\Pi_{1,n,i}^*$ ,  $\Pi_{2,n,i}^*$ ,  $\Pi_{3,n,i}$  than Kim and Lee (2016, p. 264). These are required to show (A.28) in Lemma A 2. For  $\eta_0 \in \mathbb{R}$  and  $y > 0$ , define

$$\begin{aligned} A_i(y, \boldsymbol{\theta}) &= I_{\{\widehat{U}_i(\boldsymbol{\theta}) > y^{-\gamma} U(n/k)\}}, \\ A_i(y) &= I_{\{U_i > y^{-\gamma} U(n/k)\}}, \\ A_i(y, \eta, \eta_0) &= I_{\left\{ U_i (1 + r_0^i \eta_0 V_i) \left( 1 + \frac{\eta_0 \Pi_{1,n,i}^*}{\sqrt{n}} + \text{sgn}(\eta_0) \frac{\eta_0^2 \Pi_{2,n,i}^*}{n} \right) + \frac{\eta_0 \Pi_{3,n,i}}{\sqrt{n}} + r_0^i \eta_0 V_i > y^{-\gamma} U(n/k) \right\}}. \end{aligned}$$

**Lemma A 2** (cf. Kim and Lee (2016, Lem. 19)). *Let  $\eta > 0$ ,  $\epsilon_0 \in (0, 1/10)$ ,  $r_1 \in (r_0, 1)$  and  $m_n \xrightarrow{(n \rightarrow \infty)} \infty$ ,  $m_n < n$ . Then, there exists  $\eta_0 > 0$  such that when  $\boldsymbol{\theta} \in N_n(\eta)$*

$$w_i A_i(y, \eta, -\eta_0) \leq w_i A_i(y, \boldsymbol{\theta}) \leq w_i A_i(y, \eta, \eta_0) \quad \text{for } i = m_n, \dots, n, \text{ and } y \in [0, 1 + \iota],$$

where

$$w_i := I_{\left\{ \max \left\{ \frac{|\eta_0| \Pi_{1,n,i}^*}{\sqrt{n}}, \frac{|\eta_0|^2 \Pi_{2,n,i}^*}{n}, \frac{|\eta_0| \Pi_{3,n,i}}{\sqrt{n} U(n/k)} \right\} < \epsilon_0, \quad r_0^i |\eta_0| V_i < r_1^i \right\}},$$

and for  $y \in [0, 1 + \iota]$

$$\frac{n}{k} w_i \left| \mathbb{E}_{i-1} [A_i(y, \eta, \eta_0) - A_i(y)] \right| \leq K w_i y \max \left\{ r_1^i, \frac{|\eta_0| \Pi_{1,n,i}^*}{\sqrt{n}}, \frac{|\eta_0|^2 \Pi_{2,n,i}^*}{n}, \frac{|\eta_0| \Pi_{3,n,i}}{\sqrt{n} U(n/k)} \right\}. \quad (\text{A.27})$$

Furthermore,

$$\sum_{i=m_n}^n (1 - w_i) = o_P(1), \quad (\text{A.28})$$

i.e.,  $w_{m_n} = \dots = w_n = 1$  with probability approaching 1 as  $n \rightarrow \infty$ .

**Proof:** We only show how statements (A.27) and (A.28), that differ slightly from the formulation of Kim and Lee (2016), can be proved. The insertion of  $y$  in the right-hand side of (A.27) follows as

detailed next. Write

$$\begin{aligned} A_i(y, \eta, \eta_0) &= I \left\{ U_i > \left( 1 - y^\gamma \frac{\eta_0 \Pi_{3,n,i}}{\sqrt{n} U(n/k)} - y^\gamma \frac{r_0^i \eta_0 V_i}{U(n/k)} \right) (1 + r_0^i \eta_0 V_i)^{-1} \left( 1 + \frac{\eta_0 \Pi_{1,n,i}^*}{\sqrt{n}} + \text{sgn}(\eta_0) \frac{\eta_0^2 \Pi_{2,n,i}^*}{n} \right)^{-1} y^{-\gamma} U(n/k) \right\} \\ &=: I \{ U_i > C y^{-\gamma} U(n/k) \} \end{aligned}$$

Note that for  $\tilde{C} > 0$  we get from Assumption 5 and arguments in Einmahl, Haan, and Zhou (2016, p. 46) that

$$\frac{n}{k} P \left\{ U_i > \tilde{C} y^{-\gamma} U(n/k) \right\} = \tilde{C}^{-1/\gamma} y + y \mathcal{O}(A(n/k)) = y \left[ \tilde{C}^{-1/\gamma} + o(1) \right] \quad (\text{A.29})$$

uniformly in  $y \in (0, K]$  for any  $K > 0$ . Then, if  $w_i = 1$ , we may use (A.29) to obtain

$$\begin{aligned} \frac{n}{k} \left| \mathbb{E}_{i-1} [A_i(y, \eta, \eta_0 - A_i(y))] \right| &= \frac{n}{k} \left| P \left\{ U_i > C y^{-\gamma} U(n/k) \middle| \mathcal{U}_{i-1} \right\} - P \left\{ U_i > y^{-\gamma} U(n/k) \middle| \mathcal{U}_{i-1} \right\} \right| \\ &\leq K y (C^{-1/\gamma} - 1). \end{aligned}$$

Now (A.27) follows using the mean value theorem and the definition of  $C$ .

To prove (A.28), use Markov's inequality to deduce

$$\begin{aligned} P \left\{ \sum_{i=m_n}^n (1 - w_i) \geq \varepsilon \right\} &\leq \frac{1}{\varepsilon} \mathbb{E} \left| \sum_{i=m_n}^n (1 - w_i) \right| \leq K \sum_{i=m_n}^n \mathbb{E} |1 - w_i| \\ &\leq K \sum_{i=m_n}^n \left[ P \left\{ \frac{|\eta_0| \Pi_{1,n,i}^*}{\sqrt{n}} \geq \epsilon_0 \right\} + P \left\{ \frac{|\eta_0|^2 \Pi_{2,n,i}^*}{n} \geq \epsilon_0 \right\} \right. \\ &\quad \left. + P \left\{ \frac{|\eta_0| \Pi_{3,n,i}}{\sqrt{n} U(n/k)} \geq \epsilon_0 \right\} + P \left\{ (r_0/r_1)^i |\eta_0| V_i \geq 1 \right\} \right] \\ &\leq K \sum_{i=m_n}^n \left[ n^{-v_0/2} \mathbb{E} |\Pi_{1,n,i}^*|^{v_0} + n^{-v_0/2} \mathbb{E} |\Pi_{2,n,i}^*|^{v_0} \right. \\ &\quad \left. + n^{-v_0/2} U(n/k)^{-v_0} \mathbb{E} |\Pi_{3,n,i}|^{v_0} + (r_0/r_1)^{v_i} \mathbb{E} |V_i|^{v_0} \right] \\ &= o(1), \end{aligned}$$

because of  $v_0 > 2$  and (A.26). ■

We shall need one additional lemma.

**Lemma 3.** *Let  $\eta > 0$ ,  $\eta_0 \in \mathbb{R}$  and  $B_i(y, \eta, \eta_0) := A_i(y, \eta, \eta_0) - A_i(y)$ . Then, for any  $\iota > 0$  and  $\nu \in [0, 1/2)$*

$$\sup_{y \in (0, 1+\iota]} \sup_{t \in [0, 1]} \frac{1}{\sqrt{k}} \frac{1}{y^\nu} \left| \sum_{i=m_n}^{\lfloor nt \rfloor} B_i(y, \eta, \eta_0) \right| = o_P(1).$$



**Proof:** We adapt the proof of Lemma 15 in Kim and Lee (2016). Let  $R_n = \lfloor \sqrt{k} \log n \rfloor$  and write  $B_i(y) = B_i(y, \eta, \eta_0)$  for short. There is no loss of generality in setting  $\iota = 0$ . Decompose

$$(0, 1] = \sum_{j=0}^{\infty} (y_{j+1}, y_j], \quad \text{where } y_j := y_{j,n} := e^{-j/R_n}.$$

Then note that for  $y \in (y_{j+1}, y_j]$

$$\begin{aligned} \frac{1}{\sqrt{k}} \frac{1}{y^\nu} \sum_{i=m_n}^{\lfloor nt \rfloor} B_i(y) &\leq \frac{1}{\sqrt{k}} \frac{1}{y_{j+1}^\nu} \sum_{i=m_n}^{\lfloor nt \rfloor} \{A_i(y_j, \eta, \eta_0) - A_i(y_{j+1})\} \\ &= \frac{1}{\sqrt{k}} \frac{1}{y_{j+1}^\nu} \sum_{i=m_n}^{\lfloor nt \rfloor} \{B_i(y_j) - E_{i-1} B_i(y_j)\} + \frac{1}{\sqrt{k}} \frac{1}{y_{j+1}^\nu} \sum_{i=m_n}^{\lfloor nt \rfloor} E_{i-1} B_i(y_j) \\ &\quad + \frac{1}{\sqrt{k}} \frac{1}{y_{j+1}^\nu} \sum_{i=m_n}^{\lfloor nt \rfloor} \{A_i(y_j) - A_i(y_{j+1})\} \end{aligned}$$

and

$$\begin{aligned} \frac{1}{\sqrt{k}} \frac{1}{y^\nu} \sum_{i=m_n}^{\lfloor nt \rfloor} B_i(y) &\geq \frac{1}{\sqrt{k}} \frac{1}{y_j^\nu} \sum_{i=m_n}^{\lfloor nt \rfloor} \{A_i(y_{j+1}, \eta, \eta_0) - A_i(y_j)\} \\ &= \frac{1}{\sqrt{k}} \frac{1}{y_j^\nu} \sum_{i=m_n}^{\lfloor nt \rfloor} \{B_i(y_{j+1}) - E_{i-1} B_i(y_{j+1})\} + \frac{1}{\sqrt{k}} \frac{1}{y_j^\nu} \sum_{i=m_n}^{\lfloor nt \rfloor} E_{i-1} B_i(y_{j+1}) \\ &\quad + \frac{1}{\sqrt{k}} \frac{1}{y_j^\nu} \sum_{i=m_n}^{\lfloor nt \rfloor} \{A_i(y_{j+1}) - A_i(y_j)\}. \end{aligned}$$

Hence, it suffices to show that

$$\max_{j \in \mathbb{N}_0} \sup_{t \in [0,1]} \left| \frac{1}{\sqrt{k}} \frac{1}{y_{j+1}^\nu} \sum_{i=m_n}^{\lfloor nt \rfloor} \{B_i(y_j) - E_{i-1} B_i(y_j)\} \right| = o_P(1), \quad (\text{A.30})$$

$$\max_{j \in \mathbb{N}_0} \sup_{t \in [0,1]} \left| \frac{1}{\sqrt{k}} \frac{1}{y_{j+1}^\nu} \sum_{i=m_n}^{\lfloor nt \rfloor} E_{i-1} B_i(y_j) \right| = o_P(1), \quad (\text{A.31})$$

$$\max_{j \in \mathbb{N}_0} \sup_{t \in [0,1]} \left| \frac{1}{\sqrt{k}} \frac{1}{y_{j+1}^\nu} \sum_{i=m_n}^{\lfloor nt \rfloor} \{A_i(y_j) - A_i(y_{j+1})\} \right| = o_P(1). \quad (\text{A.32})$$

First, we verify (A.30). Note for this that  $\{w_i \{B_i(y_j) - E_{i-1} B_i(y_j)\}, \mathcal{U}_i\}$  is a martingale difference sequence (m.d.s.). For some  $r_1 \in (r_0, 1)$  we have

$$\begin{aligned} &P \left\{ \max_{j \in \mathbb{N}_0} \sup_{t \in [0,1]} \left| \frac{1}{\sqrt{k}} \frac{1}{y_{j+1}^\nu} \sum_{i=m_n}^{\lfloor nt \rfloor} w_i \{B_i(y_j) - E_{i-1} B_i(y_j)\} \right| > \varepsilon \right\} \\ &\leq \sum_{j=0}^{\infty} P \left\{ \sup_{t \in [0,1]} \left| \frac{1}{\sqrt{k}} \frac{1}{y_{j+1}^\nu} \sum_{i=m_n}^{\lfloor nt \rfloor} w_i \{B_i(y_j) - E_{i-1} B_i(y_j)\} \right| > \varepsilon \right\} \end{aligned}$$

$$\begin{aligned}
&\leq \sum_{j=0}^{\infty} \frac{1}{\varepsilon^2 k} \frac{1}{y_{j+1}^{2\nu}} \mathbb{E} \left[ \sup_{t \in [0,1]} \left| \sum_{i=m_n}^{\lfloor nt \rfloor} w_i \{B_i(y_j) - \mathbb{E}_{i-1} B_i(y_j)\} \right|^2 \right] \\
&\leq \sum_{j=0}^{\infty} \frac{1}{\varepsilon^2 k} \frac{1}{y_{j+1}^{2\nu}} 4 \cdot \mathbb{E} \left[ \sum_{i=m_n}^n w_i \{B_i(y_j) - \mathbb{E}_{i-1} B_i(y_j)\} \right]^2 \\
&= \sum_{j=0}^{\infty} \frac{1}{\varepsilon^2 k} \frac{1}{y_{j+1}^{2\nu}} 4 \cdot \sum_{i=m_n}^n \mathbb{E} \left[ w_i \{B_i(y_j) - \mathbb{E}_{i-1} B_i(y_j)\} \right]^2 \\
&\leq K \sum_{j=0}^{\infty} \frac{1}{k} \frac{1}{y_{j+1}^{2\nu}} \sum_{i=m_n}^n \left| \mathbb{E} [w_i B_i(y_j)] \right| \\
&\leq K \sum_{j=0}^{\infty} \frac{y_j}{y_{j+1}^{2\nu}} \frac{1}{n} \sum_{i=m_n}^n \mathbb{E} \max \left\{ r_1^i, \frac{|\eta_0| \Pi_{1,n,i}^*}{\sqrt{n}}, \frac{|\eta_0|^2 \Pi_{2,n,i}^*}{n}, \frac{|\eta_0| \Pi_{3,n,i}}{\sqrt{n} U(n/k)} \right\} \\
&\leq K \sum_{j=0}^{\infty} \frac{e^{-j/R_n}}{e^{-(j+1)2\nu/R_n}} \left[ \frac{1}{n} \sum_{i=m_n}^n r_1^i + \frac{1}{n^{3/2}} \sum_{i=m_n}^n \mathbb{E} |\Pi_{1,n,i}^*| \right. \\
&\quad \left. + \frac{1}{n^2} \sum_{i=m_n}^n \mathbb{E} |\Pi_{2,n,i}^*| + \frac{1}{n^{3/2} U(n/k)} \sum_{i=m_n}^n \mathbb{E} |\Pi_{3,n,i}| \right] \\
&= \mathcal{O} \left( \frac{1}{\sqrt{n}} \right) \sum_{j=0}^{\infty} \left( e^{(2\nu-1)/R_n} \right)^j = \mathcal{O} \left( \frac{1}{\sqrt{n}} \right) \frac{1}{1 - e^{(2\nu-1)/R_n}} = \mathcal{O} \left( \frac{1}{\sqrt{n}} \right) \frac{1}{\frac{1-2\nu+o(1)}{R_n}} \\
&= \mathcal{O} \left( \frac{R_n}{\sqrt{n}} \right) = \mathcal{O} \left( \frac{\sqrt{k} \log n}{\sqrt{n}} \right) = o(1),
\end{aligned}$$

where the first step follows by subadditivity, the second by Chebyshev's inequality, the third by Doob's inequality (e.g., Davidson, 1994, Thm. 15.15), the fourth by uncorrelatedness of the zero-mean m.d.s., the sixth by the law of iterated expectations and Lemma A 2 and the eighth by (A.26). Note for the fifth step that  $B_i(y_j) \in \{0, 1\}$  or  $\{-1, 0\}$  according as  $\eta_0 > 0$  or  $< 0$ , so that

$$\mathbb{E} \left[ w_i \{B_i(y_j) - \mathbb{E}_{i-1} B_i(y_j)\} \right]^2 = \mathbb{E} [w_i B_i^2(y_j)] - \mathbb{E} [w_i \{ \mathbb{E}_{i-1} B_i(y_j) \}^2] \leq \left| \mathbb{E} [w_i B_i(y_j)] \right|.$$

The result follows, since  $w_{m_n} = \dots = w_n = 1$  with probability tending to 1 by Lemma A 2.

As for (A.31), observe that by Lemma A 2 the left-hand side can be bounded by

$$K \frac{1}{\sqrt{k}} \sum_{i=m_n}^n \frac{k}{n} w_i \max \left\{ r_1^i, \frac{|\eta_0| \Pi_{1,n,i}^*}{\sqrt{n}}, \frac{|\eta_0|^2 \Pi_{2,n,i}^*}{n}, \frac{|\eta_0| \Pi_{3,n,i}}{\sqrt{n} U(n/k)} \right\} = o_P(1).$$

The result follows as before.

Now we show (A.32). Write

$$\frac{1}{\sqrt{k}} \frac{1}{y_{j+1}^\nu} \sum_{i=m_n}^{\lfloor nt \rfloor} \{A_i(y_j) - A_i(y_{j+1})\} = \frac{\sqrt{k}}{y_{j+1}^\nu} \left\{ \left( \frac{1}{k} \sum_{i=m_n}^{\lfloor nt \rfloor} A_i(y_j) - y_j t \right) \right.$$

$$\begin{aligned}
& - \left( \frac{1}{k} \sum_{i=m_n}^{\lfloor nt \rfloor} A_i(y_{j+1}) - y_{j+1}t \right) + (y_j - y_{j+1})t \Bigg\} \\
& = \left( \frac{y_j}{y_{j+1}} \right)^\nu M_n(t, y_j) - M_n(t, y_{j+1}) + \sqrt{k} \frac{y_j - y_{j+1}}{y_{j+1}^\nu} t \\
& = M_n(t, y_j) - M_n(t, y_{j+1}) + o_P(1),
\end{aligned}$$

because  $(y_j/y_{j+1})^\nu = 1 + o(1)$  and  $M_n(t, y) = \mathcal{O}_P(1)$  (by Proposition 1) uniformly, and  $\sqrt{k}/R_n = o(1)$ .

Furthermore, for any  $\delta > 0$

$$\begin{aligned}
& P \left\{ \max_{j \in \mathbb{N}_0} \sup_{t \in [0,1]} |M_n(t, y_j) - M_n(t, y_{j+1})| > \varepsilon \right\} \\
& \leq P \left\{ \sup_{|w_1 - w_2| < \delta} \sup_{t \in [0,1]} |M_n(t, w_1) - M_n(t, w_2)| > \varepsilon \right\} \\
& \xrightarrow{(n \rightarrow \infty)} P \left\{ \sup_{|w_1 - w_2| < \delta} \sup_{t \in [0,1]} |w_1^{-\nu} W(t, w_1) - w_2^{-\nu} W(t, w_2)| > \varepsilon \right\} \xrightarrow{(\delta \downarrow 0)} 0
\end{aligned}$$

by continuity of the sample paths of the Brownian sheet  $W(\cdot, \cdot)$ ; see also Hoga (2017a, Prop. 2). Hence, (A.32) follows and the proof is complete.  $\blacksquare$

**Proof of Proposition 2:** The proof resembles that of Proposition 5 in Kim and Lee (2016). We give it here to convey the main idea. Let  $\eta > 0$  and  $m_n \rightarrow \infty$  with  $m_n = o(\sqrt{k})$  as  $n \rightarrow \infty$ . Then, due to Lemma A 2, there exists  $\eta_0 > 0$  such that with probability approaching 1,

$$\frac{1}{y^\nu} \{A_i(y, \eta, -\eta_0) - A_i(y)\} \leq \frac{1}{y^\nu} \{A_i(y, \boldsymbol{\theta}) - A_i(y)\} \leq \frac{1}{y^\nu} \{A_i(y, \eta, \eta_0) - A_i(y)\}$$

for  $\boldsymbol{\theta} \in N_n(\eta)$ ,  $i = m_n, \dots, n$ . Whence from Lemma 3,

$$\sup_{\boldsymbol{\theta} \in N_n(\eta)} \sup_{y \in (0, 1+\iota]} \sup_{t \in [0,1]} \frac{1}{y^\nu} \frac{1}{\sqrt{k}} \left| \sum_{i=1}^{\lfloor nt \rfloor} \{A_i(y, \boldsymbol{\theta}) - A_i(y)\} \right| = o_P(1).$$

Because by Assumption 4,  $\widehat{\boldsymbol{\theta}} \in N_n(\eta)$  with probability tending to 1 as  $n \rightarrow \infty$  followed by  $\eta \rightarrow \infty$ , the result follows.  $\blacksquare$

## References

- Chan, N.H. et al. (2007). “Interval Estimation of Value-at-Risk Based on GARCH Models with Heavy-Tailed Innovations”. *Journal of Econometrics* 137, pp. 556–576.
- Davidson, James (1994). *Stochastic Limit Theory*. Oxford: Oxford University Press.
- Drees, H. (2003). “Extreme Quantile Estimation for Dependent Data, with Applications to Finance”. *Bernoulli* 9, pp. 617–657.

- Einmahl, J.H.J., L. de Haan, and C. Zhou (2016). “Statistics of Heteroscedastic Extremes”. *Journal of the Royal Statistical Society: Series B (Statistical Methodology)* 78, pp. 31–51.
- Gomes, M.I. and D. Pestana (2007). “A Sturdy Reduced-Bias Extreme Quantile (VaR) Estimator”. *Journal of the American Statistical Association* 102, pp. 280–292.
- Haan, L. de and A. Ferreira (2006). *Extreme Value Theory*. New York: Springer.
- Hill, B. (1975). “A Simple General Approach to Inference About the Tail of a Distribution”. *The Annals of Statistics* 3, pp. 1163–1174.
- Hoga, Y. (2017a). “Change Point Tests for the Tail Index of  $\beta$ -Mixing Random Variables”. *Econometric Theory* 33, pp. 915–954.
- Hoga, Y. (2017b). “Testing for Changes in (Extreme) VaR”. *Econometrics Journal* 20, pp. 23–51.
- Kim, L. and S. Lee (2016). “On the Tail Index Inference for Heavy-Tailed GARCH-Type Innovations”. *Annals of the Institute of Statistical Mathematics* 68, pp. 237–267.
- Pan, X., X. Leng, and T. Hu (2013). “The Second-Order Version of Karamata’s Theorem with Applications”. *Statistics & Probability Letters* 83, pp. 1397–1403.
